# Supplementary material for: α-NiS grown on reduced graphene oxide and single-wall carbon nanotubes as electrode materials for high-power supercapacitors
Source: Royal Society of Chemistry journal article supplement (doi:10.1039/c5ra02996a), 2015-01-01
Supplement: c5ra02996a1.pdf [file c5ra02996a1.pdf]

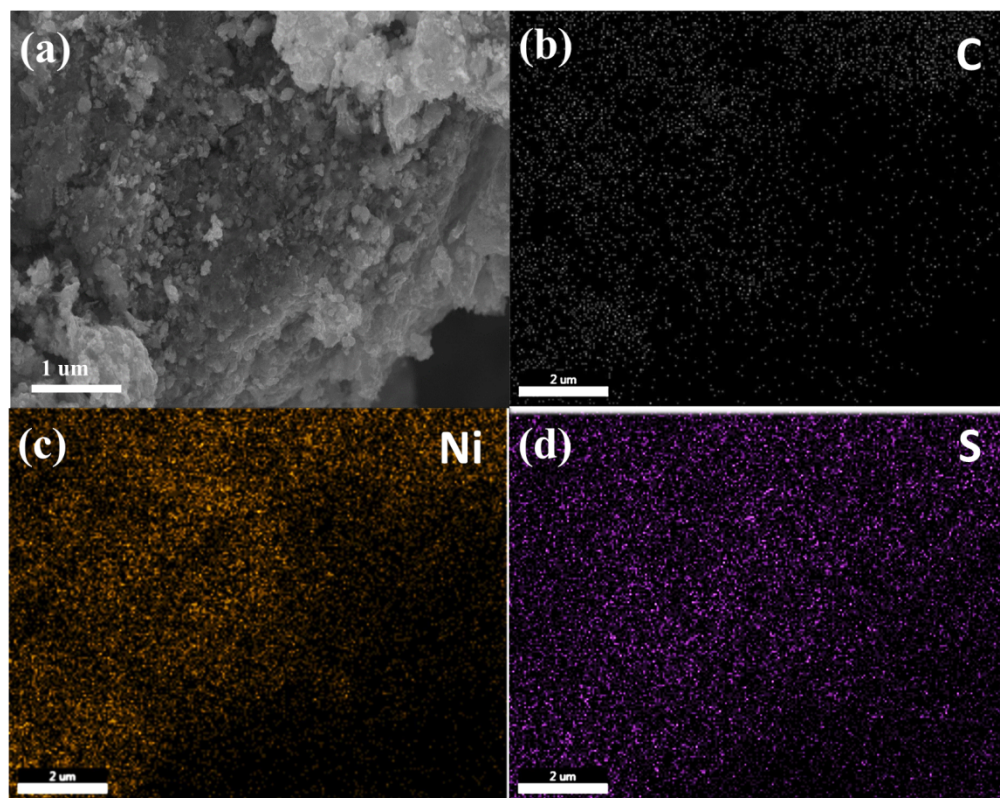

**Fig. S1** Selected SEM (a) and EDX mapping of Ni (b), S (c) and C (d) elements

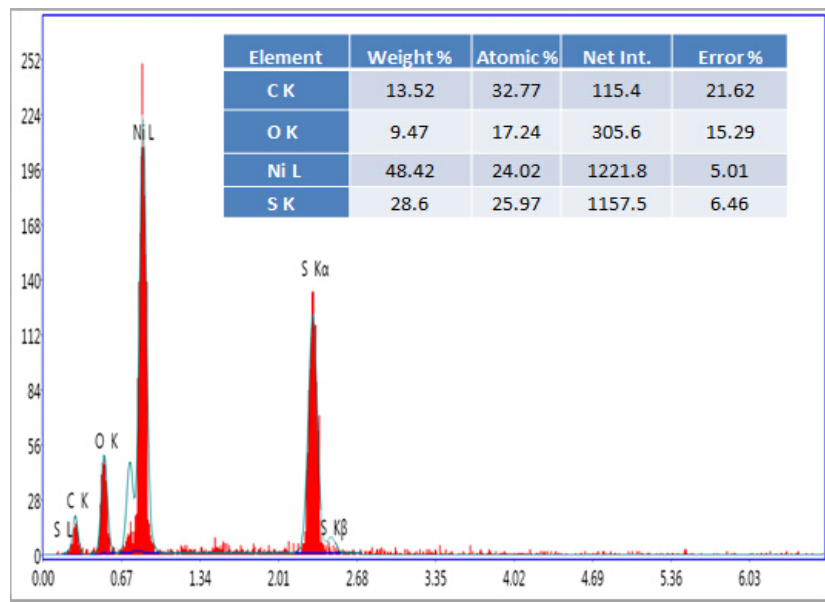

**Fig. S2** Element ratio of Ni, S and C in NiS/SWNTs composite
